# Supplementary material for: Emergence of superconductivity by intercalation of alkali metals and alkaline earth metals in Janus transition-metal dichalcogenide heterostructures
Source: Royal Society of Chemistry journal article supplement (doi:10.1039/d4cp01184h), 2024-01-01
Supplement: d4cp01184h2.pdf [file d4cp01184h2.pdf]

## Supplemental Material for: Emergence of superconductivity by intercalation of alkali metals and alkaline earth metals in Janus transition-metal dichalcogenides heterostructures

Soukaina Er-Rahmany<sup>a,b,\*</sup>, Mohammed Loulidi<sup>a,\*</sup>, Abdallah El Kenz<sup>a</sup>, Abdelilah Benyoussef<sup>a,c</sup>, Mohamed Balli<sup>b</sup>, Mohamed Azzouz<sup>d</sup>

<sup>a</sup>*Laboratory of Condensed Matter and Interdisciplinary Sciences, Unite de Recherche Labellisee CNRST, URL-CNRST-17, Faculty of Sciences, Mohammed V University of Rabat, Morocco.*

<sup>b</sup>*AMEEC Team, LERMA, College of Engineering and Architecture, International University of Rabat, Parc Technopolis, Rocade de Rabat-Salé, 11100, Morocco.*

<sup>c</sup>*Hassan II Academy of Sciences and Techniques, Rabat, Morocco.*

<sup>d</sup>*Al Akhawayn University, School of Science and Engineering, P.O Box 104, Hassan II Avenue, 53000 Ifrane, Morocco*

---

\*Correspondence author: [errahmanysoukaina@gmail.com](mailto:errahmanysoukaina@gmail.com),  
[soukainaerrahmany@um5.ac.ma](mailto:soukainaerrahmany@um5.ac.ma)  
[loulidim60@gmail.com](mailto:loulidim60@gmail.com)

**Table.S1**The convergence tests for the electron-phonon coupling.

| Materials                | k- point grid | g- point grid | $\lambda$ | Materials               | k- point grid | g- point grid | $\lambda$ |
|--------------------------|---------------|---------------|-----------|-------------------------|---------------|---------------|-----------|
| (MoSSe) <sub>2</sub> -Li | 16×16×1       | 8×8×1         | 0.77      | (WSSe) <sub>2</sub> -Ca | 16×16×1       | 8×8×1         | 1.44      |
|                          | 20×20×1       | 10×10×1       | 0.84      |                         | 20×20×1       | 10×10×1       | 1.48      |
|                          | 24×24×1       | 12×12×1       | 0.84      |                         | 24×24×1       | 12×12×1       | 1.48      |
| (MoSSe) <sub>2</sub> -Na | 16×16×1       | 8×8×1         | 0.47      | (WSSe) <sub>2</sub> -K  | 16×16×1       | 8×8×1         | 1.64      |
|                          | 20×20×1       | 10×10×1       | 0.51      |                         | 20×20×1       | 10×10×1       | 1.69      |
|                          | 24×24×1       | 12×12×1       | 0.51      |                         | 24×24×1       | 12×12×1       | 1.69      |
| (MoSSe) <sub>2</sub> -Mg | 16×16×1       | 8×8×1         | 0.53      | (WSSe) <sub>2</sub> -Sr | 16×16×1       | 8×8×1         | 1.63      |
|                          | 20×20×1       | 10×10×1       | 0.56      |                         | 20×20×1       | 10×10×1       | 1.68      |
|                          | 24×24×1       | 12×12×1       | 0.56      |                         | 24×24×1       | 12×12×1       | 1.68      |
| (MoSSe) <sub>2</sub> -Ca | 16×16×1       | 8×8×1         | 0.85      | MoSSe-Li-WSSe           | 16×16×1       | 8×8×1         | 0.93      |
|                          | 20×20×1       | 10×10×1       | 0.92      |                         | 20×20×1       | 10×10×1       | 0.98      |
|                          | 24×24×1       | 12×12×1       | 0.92      |                         | 24×24×1       | 12×12×1       | 0.98      |
| (MoSSe) <sub>2</sub> -K  | 16×16×1       | 8×8×1         | 1.01      | MoSSe-Na-WSSe           | 16×16×1       | 8×8×1         | 0.88      |
|                          | 20×20×1       | 10×10×1       | 1.05      |                         | 20×20×1       | 10×10×1       | 0.91      |
|                          | 24×24×1       | 12×12×1       | 1.05      |                         | 24×24×1       | 12×12×1       | 0.91      |
| (MoSSe) <sub>2</sub> -Sr | 16×16×1       | 8×8×1         | 0.99      | MoSSe-Mg-WSSe           | 16×16×1       | 8×8×1         | 0.55      |
|                          | 20×20×1       | 10×10×1       | 1.04      |                         | 20×20×1       | 10×10×1       | 0.57      |
|                          | 24×24×1       | 12×12×1       | 1.04      |                         | 24×24×1       | 12×12×1       | 0.57      |
| (WSSe) <sub>2</sub> -Li  | 16×16×1       | 8×8×1         | 0.69      | MoSSe-Ca-WSSe           | 16×16×1       | 8×8×1         | 1.93      |
|                          | 20×20×1       | 10×10×1       | 0.74      |                         | 20×20×1       | 10×10×1       | 1.98      |
|                          | 24×24×1       | 12×12×1       | 0.74      |                         | 24×24×1       | 12×12×1       | 1.98      |
| (WSSe) <sub>2</sub> -Na  | 16×16×1       | 8×8×1         | 0.52      | MoSSe-K-WSSe            | 16×16×1       | 8×8×1         | 2.07      |
|                          | 20×20×1       | 10×10×1       | 0.58      |                         | 20×20×1       | 10×10×1       | 2.12      |
|                          | 24×24×1       | 12×12×1       | 0.58      |                         | 24×24×1       | 12×12×1       | 2.12      |
| (WSSe) <sub>2</sub> -Mg  | 16×16×1       | 8×8×1         | 0.53      | MoSSe-Sr-WSSe           | 16×16×1       | 8×8×1         | 1.71      |
|                          | 20×20×1       | 10×10×1       | 0.57      |                         | 20×20×1       | 10×10×1       | 1.78      |
|                          | 24×24×1       | 12×12×1       | 0.57      |                         | 24×24×1       | 12×12×1       | 1.78      |

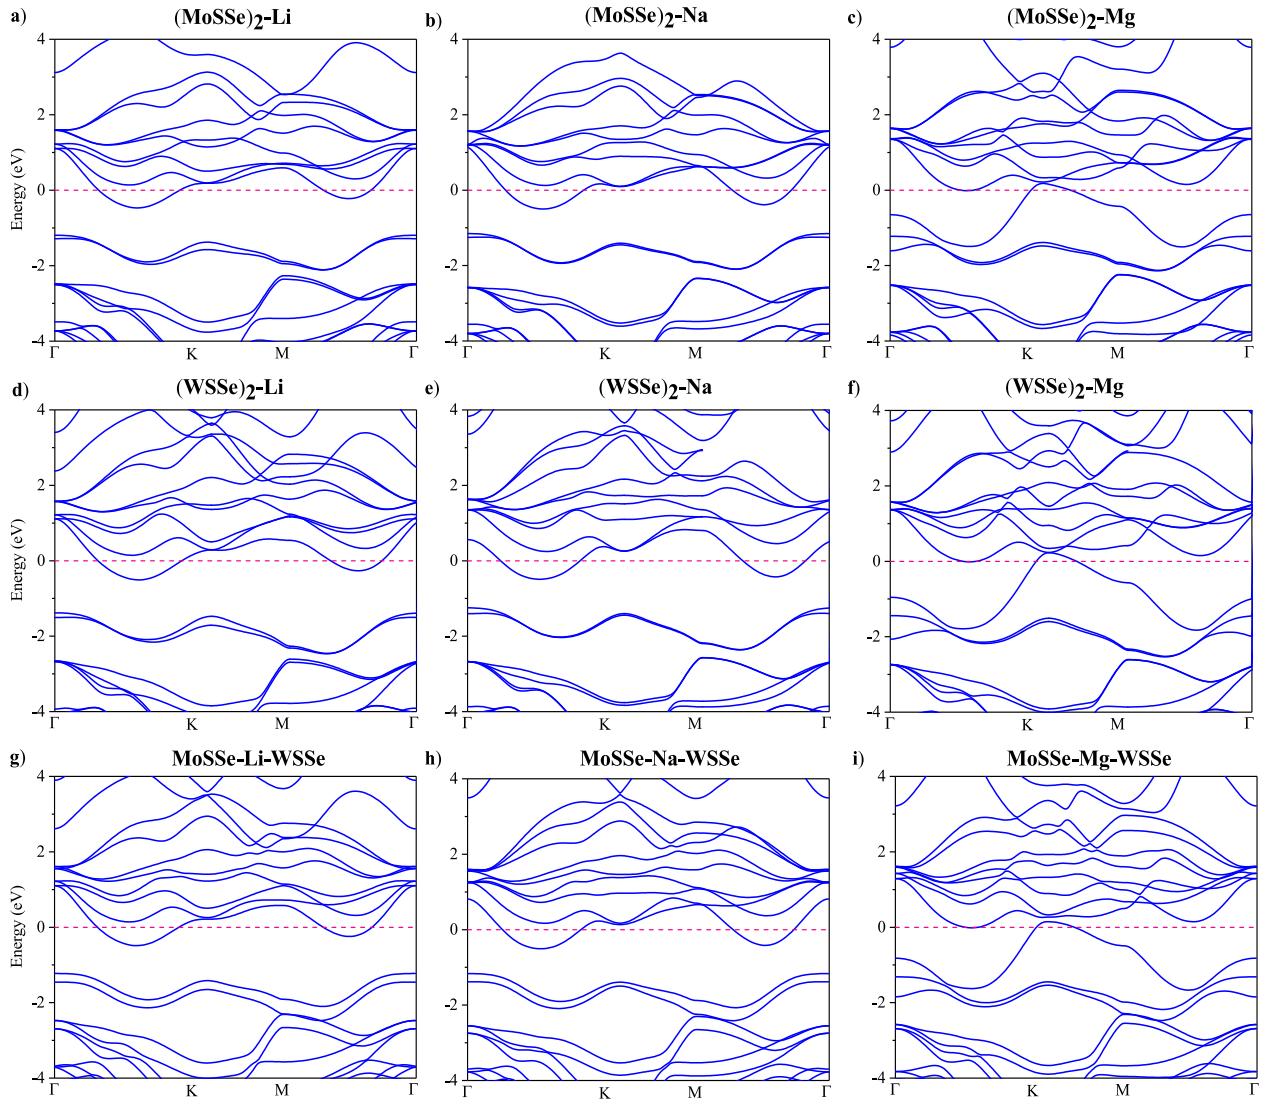

**Fig. S1** Calculated electronic band structures of Janus MSSe ( $M = \text{Mo}$  or  $\text{W}$ ) bilayer and Janus MoSSe/WSSe heterostructure intercalated with the alkali metal (Li, Na) or alkaline earth metals (Mg).

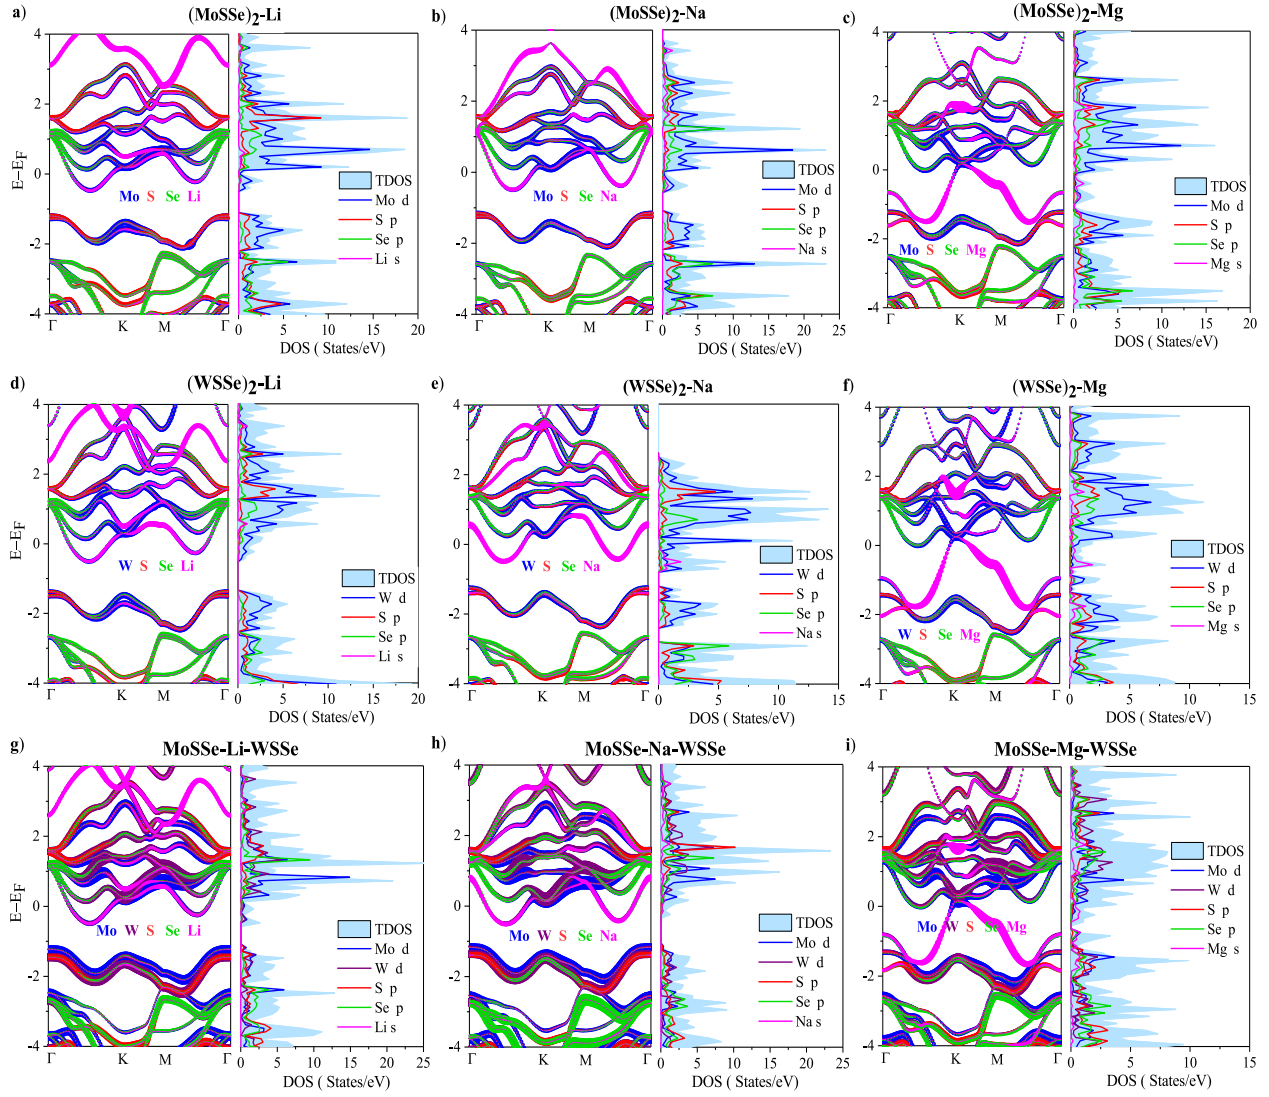

**Fig. S2** The projected band structures, electronic total, and partial DOS calculated of Janus MSSe ( $M = \text{Mo}$  or  $\text{W}$ ) bilayer and Janus MoSSe/WSSe heterostructure intercalated with the alkali metal (Li, Na) or alkaline earth metals (Mg).



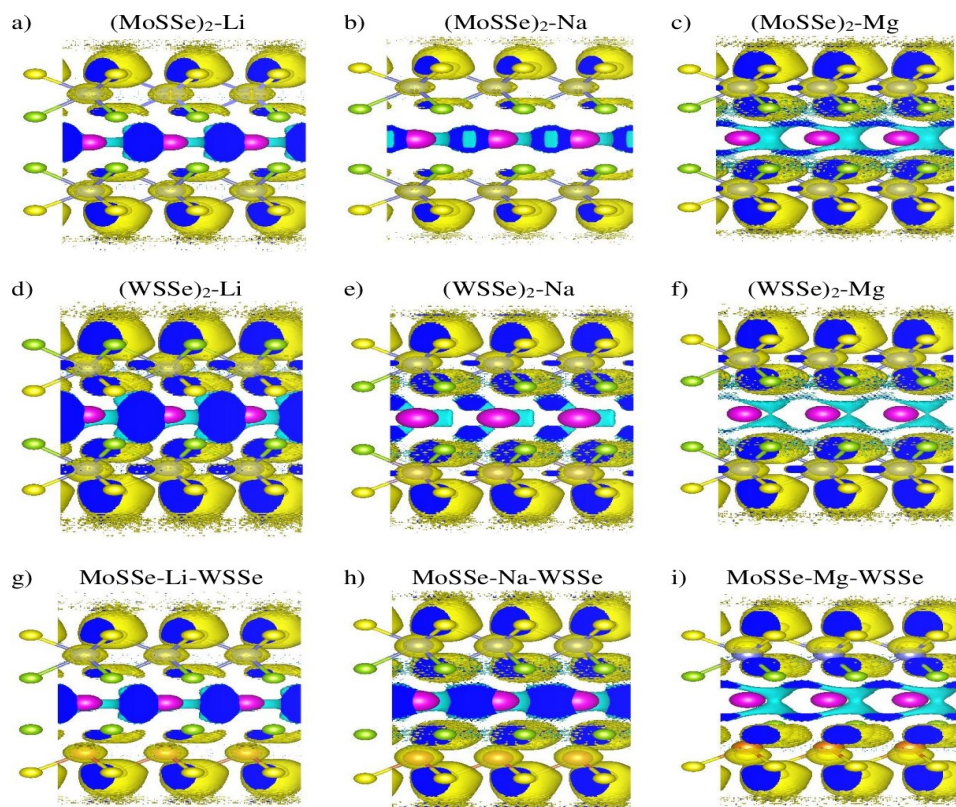

**Fig. S3** The charge density difference plots for Janus MSSe ( $M = \text{Mo}$  or  $\text{W}$ ) bilayer and Janus MoSSe/WSSe heterostructure intercalated with the alkali metal (Li, Na) or alkaline earth metals (Mg).

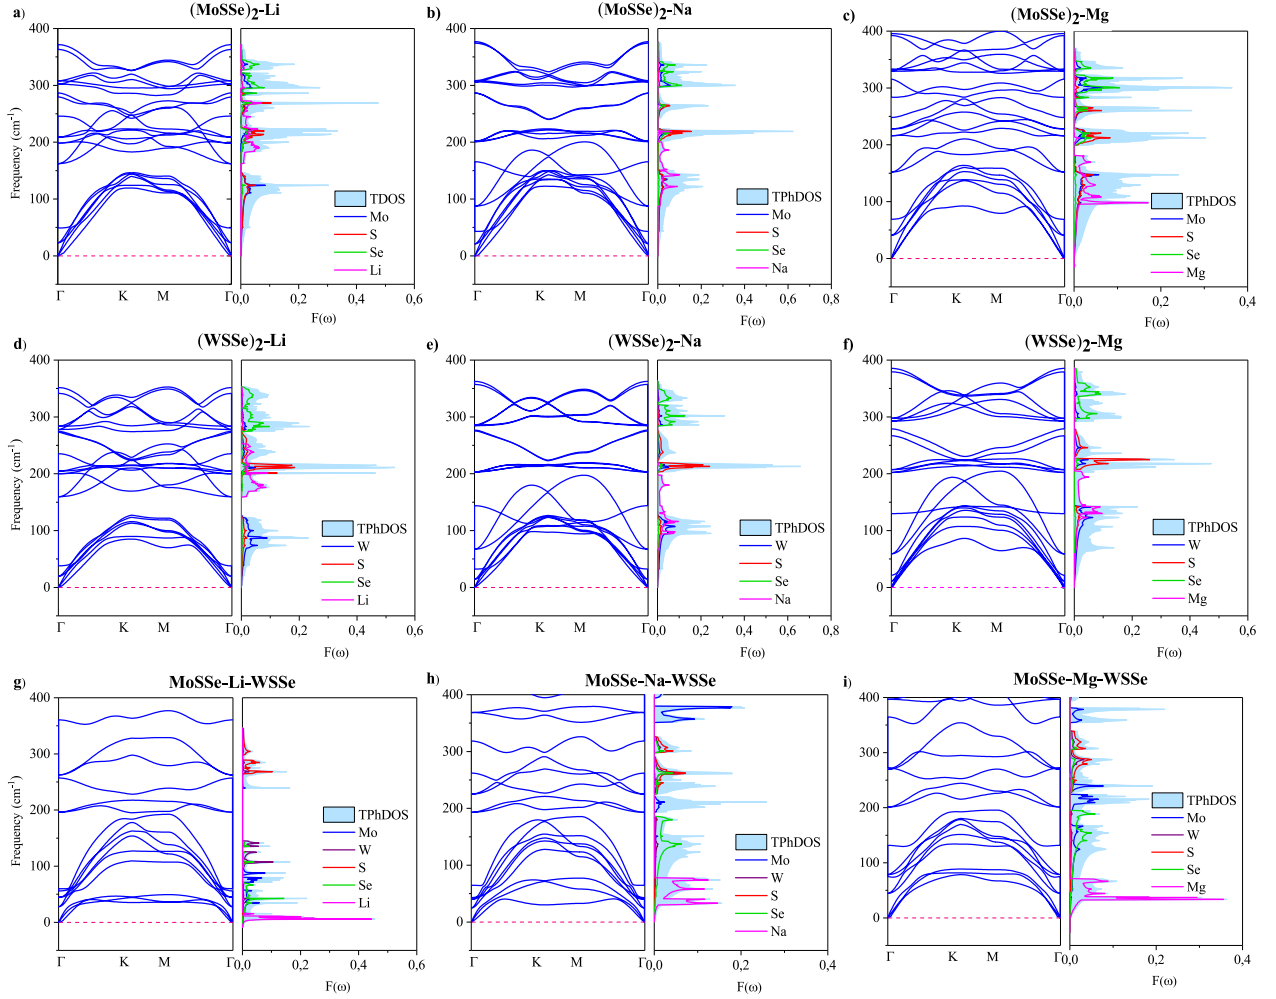

**Fig. S4** The phonon dispersion and phonons density of states for Janus MSSe ( $M = \text{Mo}$  or  $\text{W}$ ) bilayer and Janus MoSSe/WSSe heterostructure intercalated with the alkali metal (Li, Na) or alkaline earth metals (Mg).

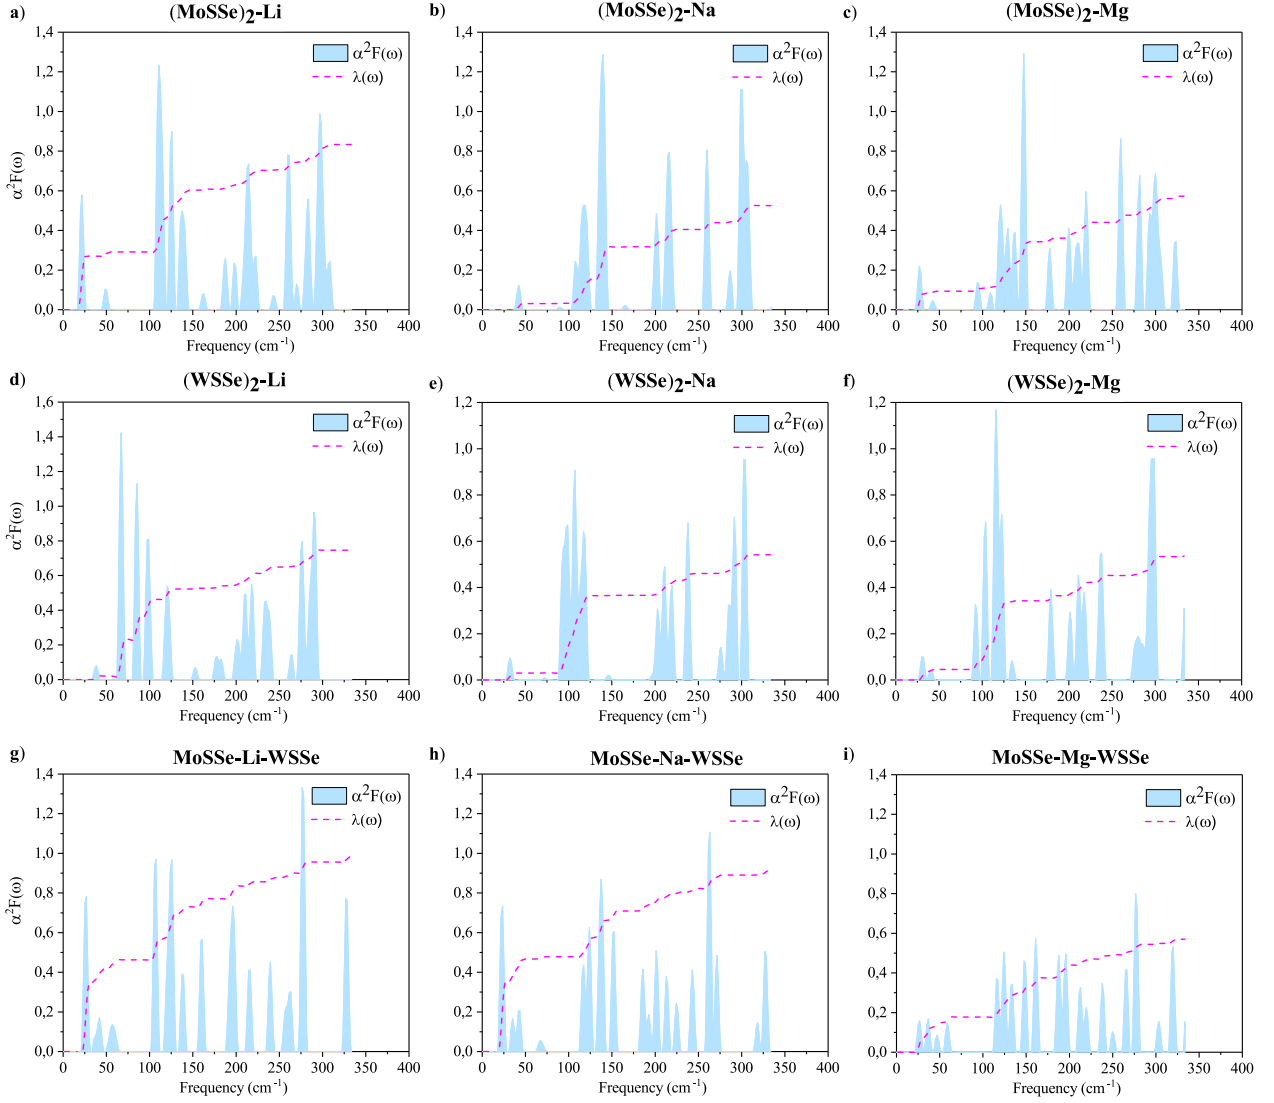

**Fig. S5** Calculated spectral function for Janus MSSe ( $M = \text{Mo}$  or  $\text{W}$ ) bilayer and Janus MoSSe/WSSe heterostructure intercalated with the alkali metal (Li, Na) or alkaline earth metals (Mg).

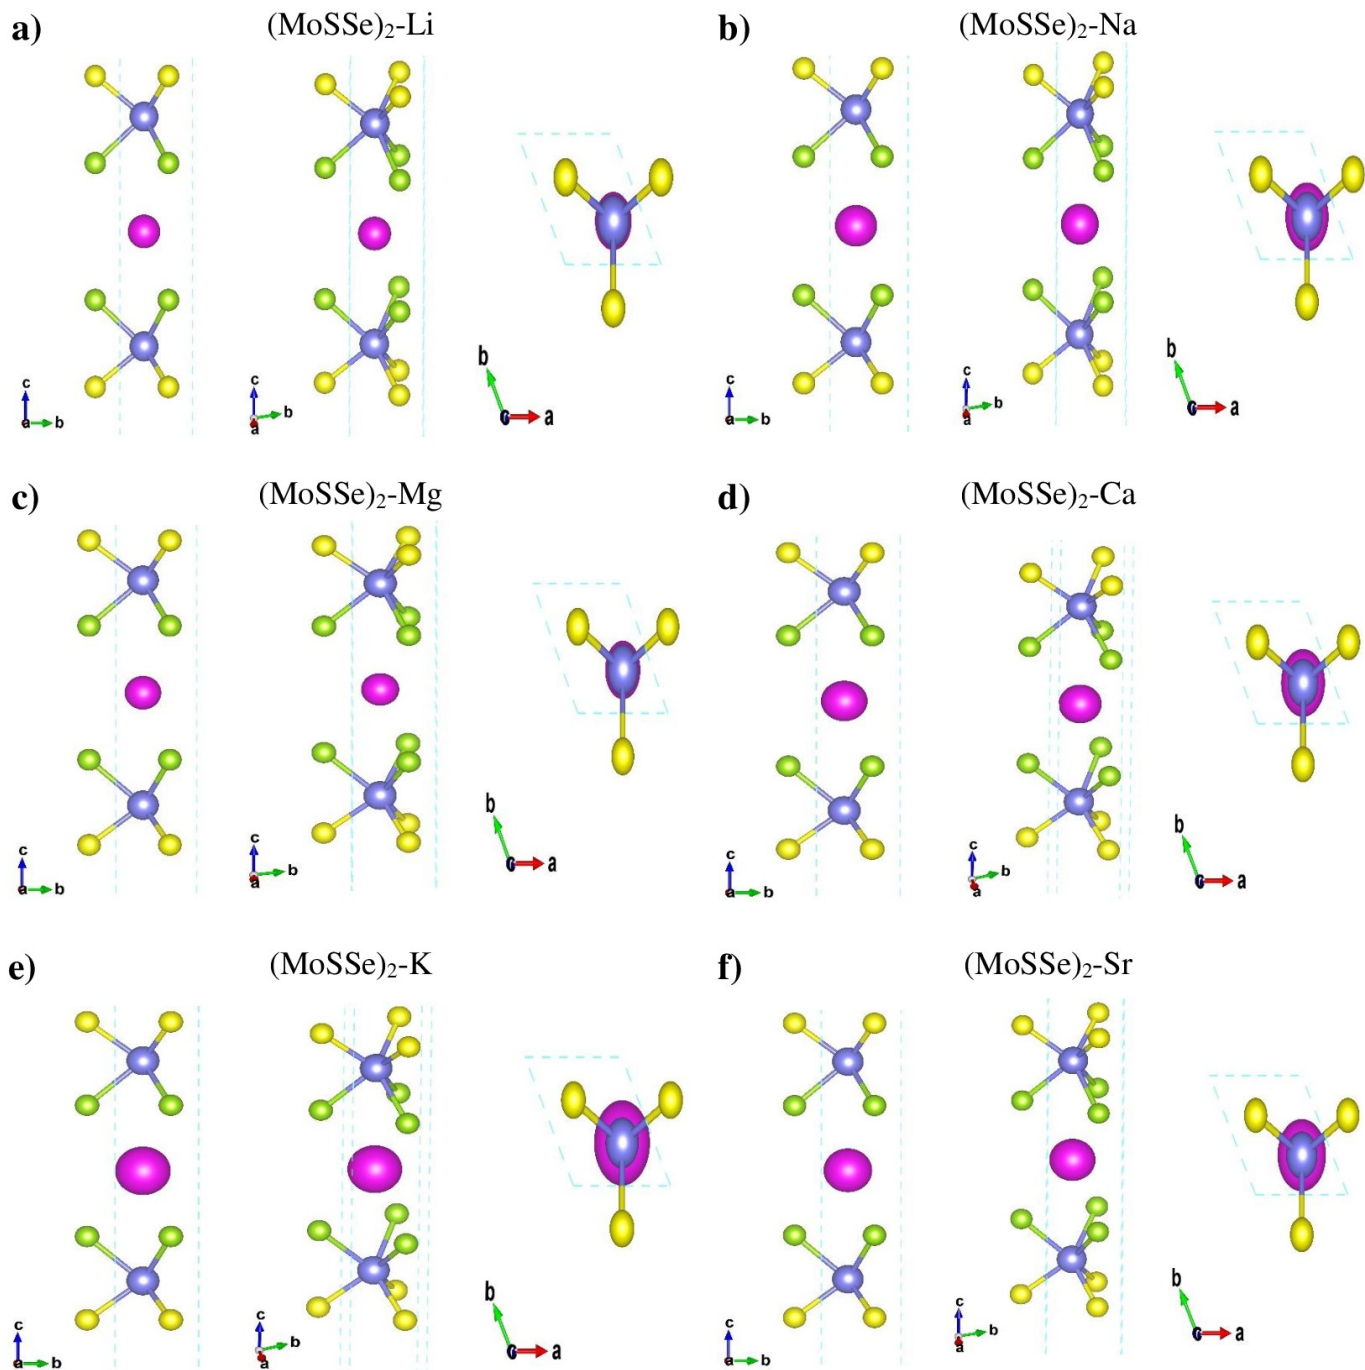

**Fig. S6** The crystal structure of Janus MoSSe intercalated with the alkali metal (Li, Na, K) or alkaline earth metals (Mg, Ca, Sr).

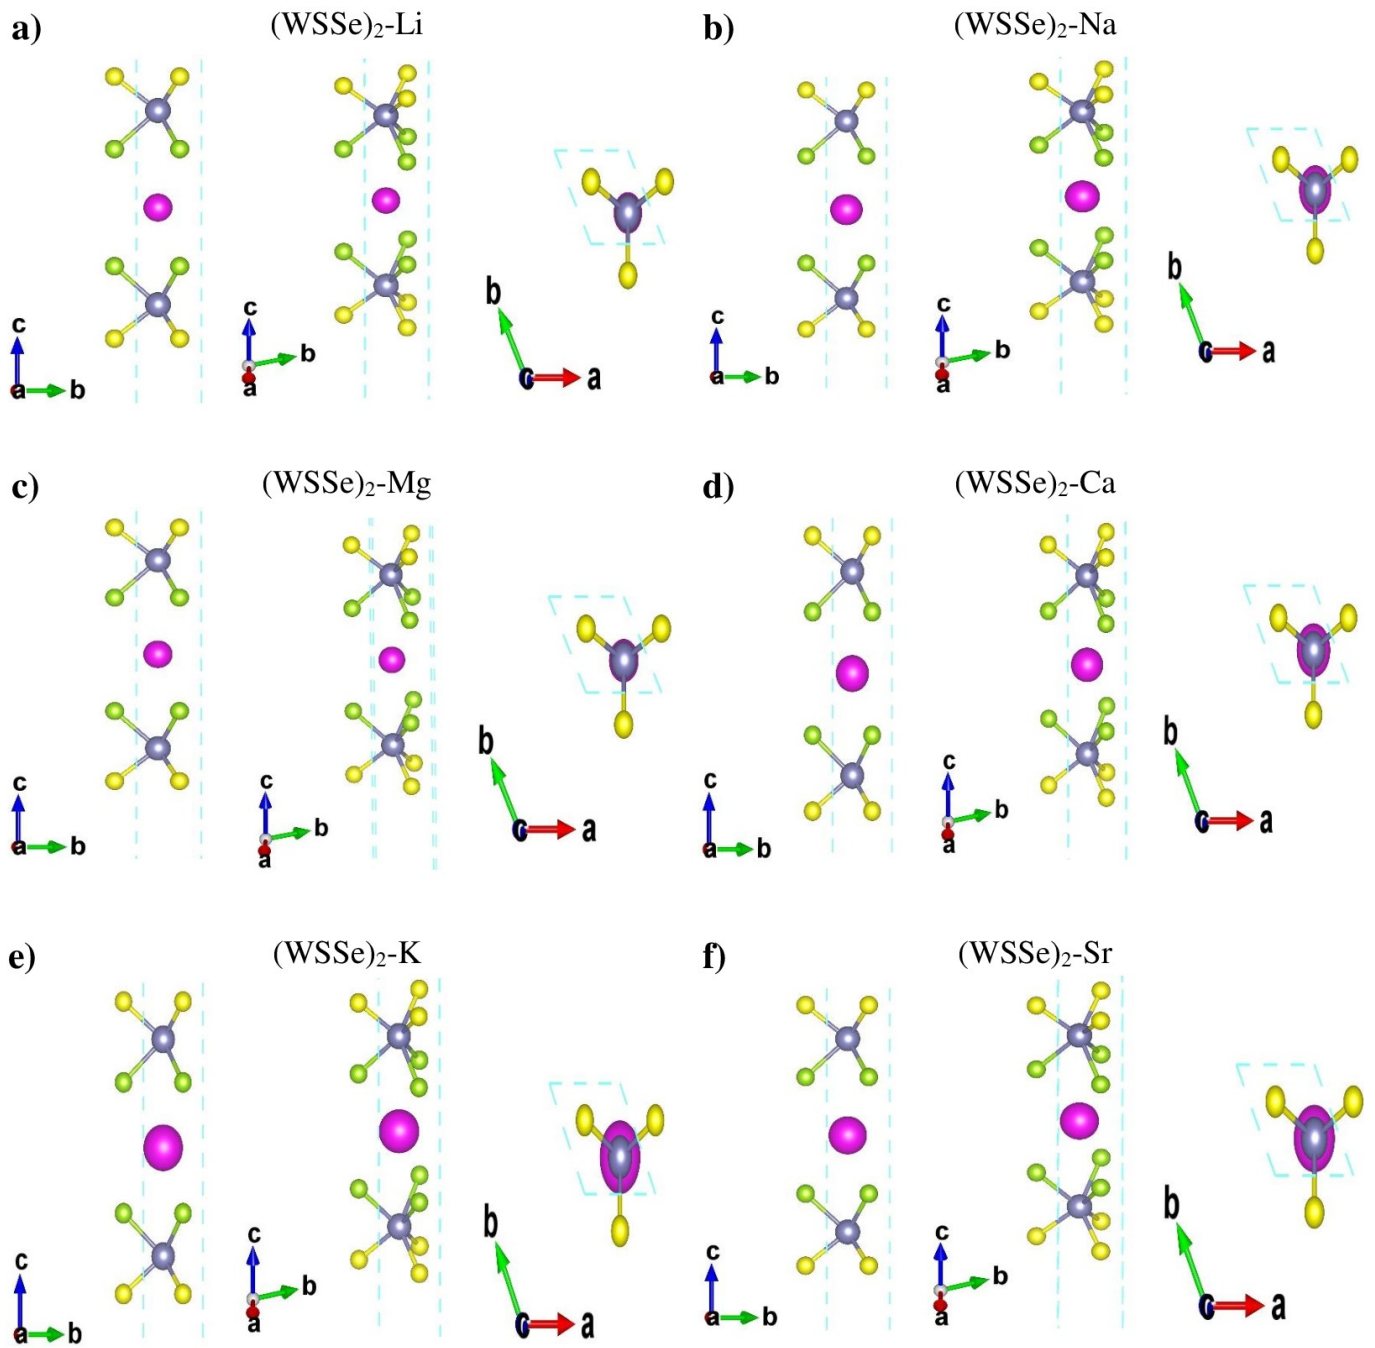

**Fig. S7** The crystal structure of Janus WSSe intercalated with the alkali metal (Li, Na, K) or alkaline earth metals (Mg, Ca, Sr).



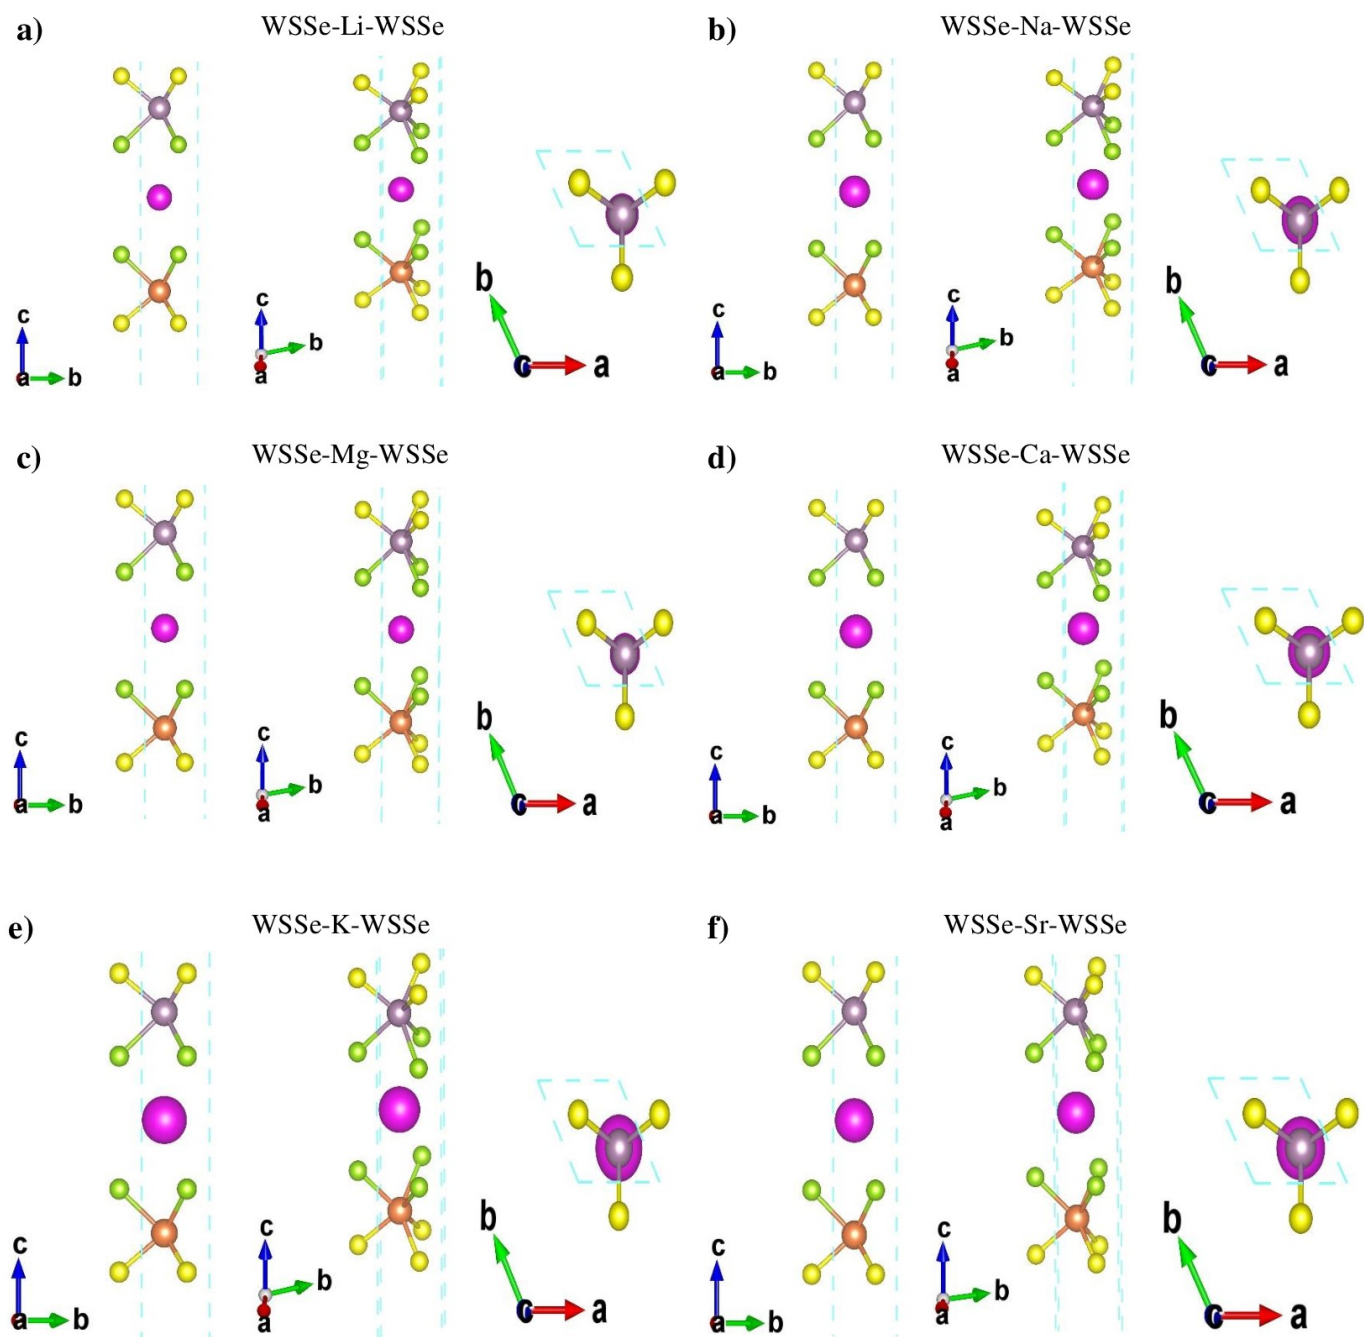

**Fig. S8** The crystal structure of Janus MoSSe/WSSe heterostructure intercalated with the alkali metal (Li, Na, K) or alkaline earth metals (Mg, Ca, Sr).
